# Supplementary material for: Modeling invasive lobular breast carcinoma by CRISPR/Cas9-mediated somatic genome editing of the mammary gland
Source: PubMed Central journal article supplement — Genes Dev. 2016 Jun 15;30(12):1470–80. doi: 10.1101/gad.279190.116 (PMC4926868; doi:10.1101/gad.279190.116), 2016-06-15

A Tumor growth kinetics

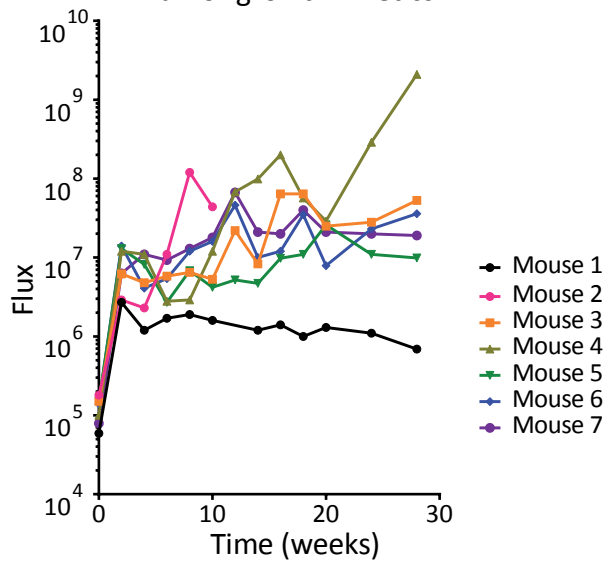

B Tumors per gland

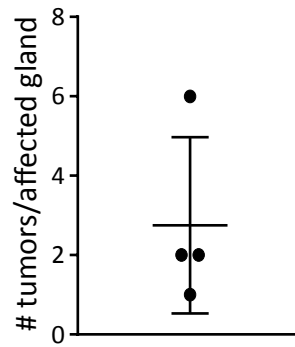

C Tumor burden

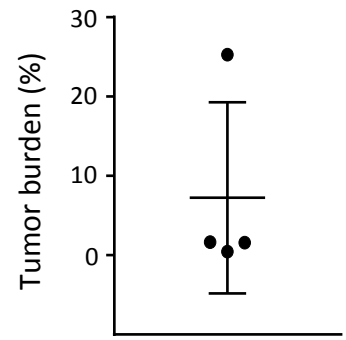

D Recombination of *Cdh1<sup>F</sup>* and *invCAG-AktE17K-IRES-Luc*

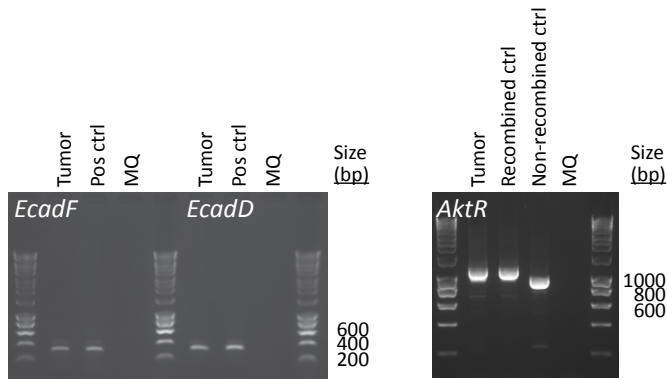

Supplement: supp_30.12.1470_Supplemental_Figure_S3.pdf [file supp_30.12.1470_Supplemental_Figure_S3.pdf]
