# Supplementary material for: Modeling invasive lobular breast carcinoma by CRISPR/Cas9-mediated somatic genome editing of the mammary gland
Source: PubMed Central journal article supplement — Genes Dev. 2016 Jun 15;30(12):1470–80. doi: 10.1101/gad.279190.116 (PMC4926868; doi:10.1101/gad.279190.116), 2016-06-15

A Brains of 9 days old pups  
*mT/mG*      *WapCre;mT/mG*

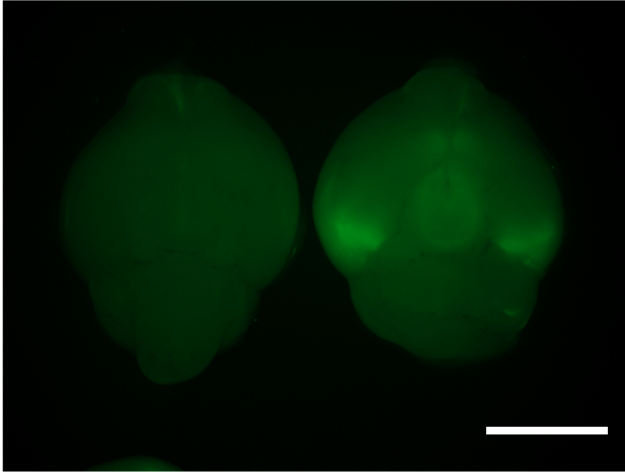

B Brains of 17 days old females  
*mT/mG*      *WapCre;mT/mG*

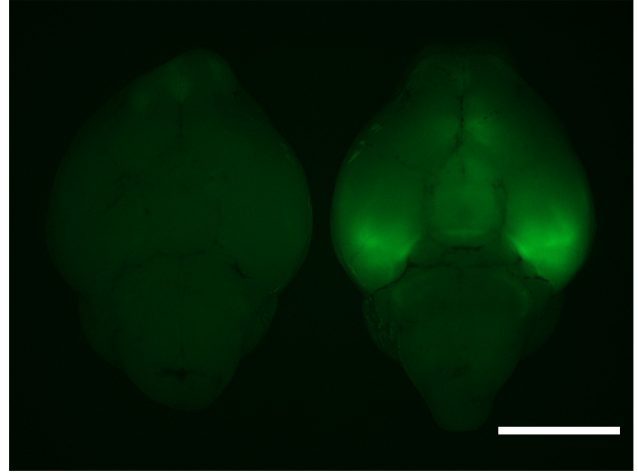

C Brains of 27 days old females  
*mT/mG*      *WapCre;mT/mG*

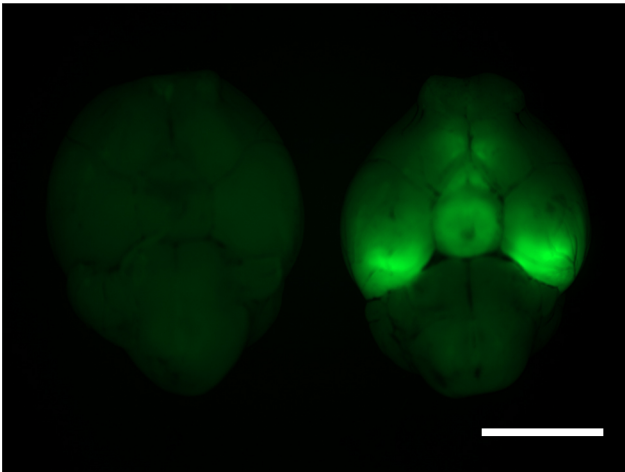

D Mammary glands of 27 days old females  
           *mT/mG*      *WapCre;mT/mG*  
                     

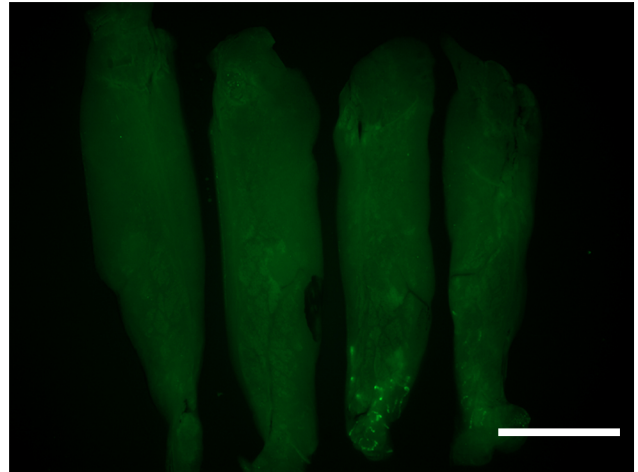

Supplement: supp_30.12.1470_Supplemental_Figure_S9.pdf [file supp_30.12.1470_Supplemental_Figure_S9.pdf]
