# Supplementary figures and images for: Modeling invasive lobular breast carcinoma by CRISPR/Cas9-mediated somatic genome editing of the mammary gland
Source: PubMed Central journal article supplement — Genes Dev. 2016 Jun 15;30(12):1470–80. doi: 10.1101/gad.279190.116 (PMC4926868; doi:10.1101/gad.279190.116), 2016-06-15

## A Lenti-GFP in FVB wt

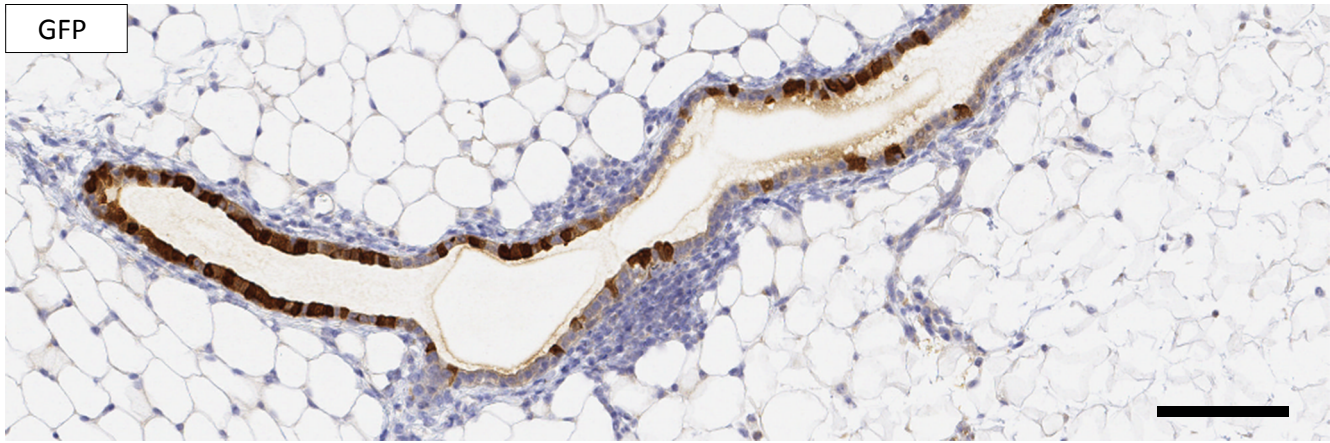

## B

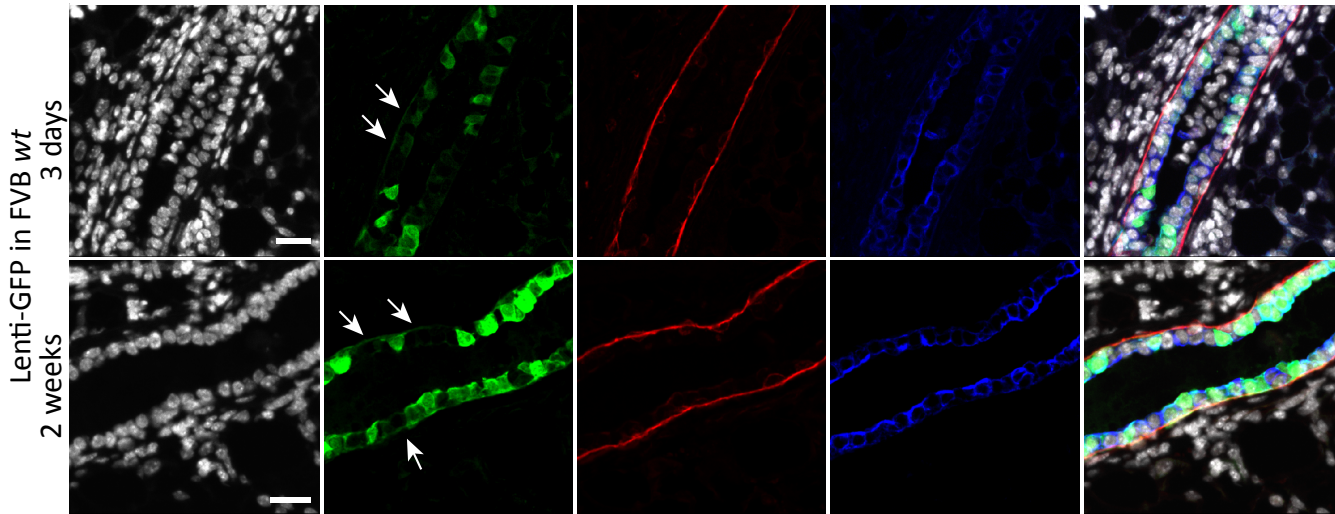C Adeno-Cre in *mT/mG*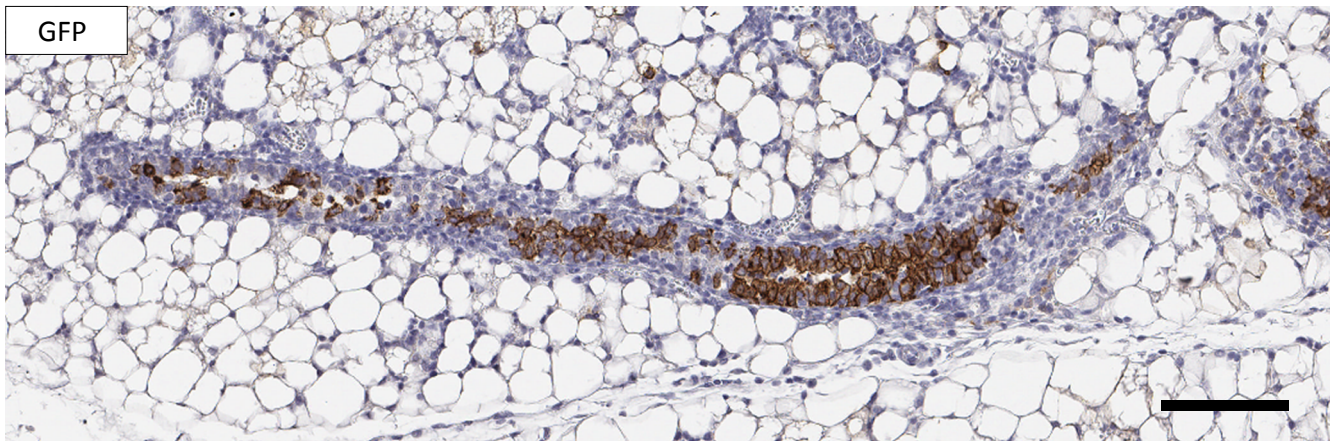

## D

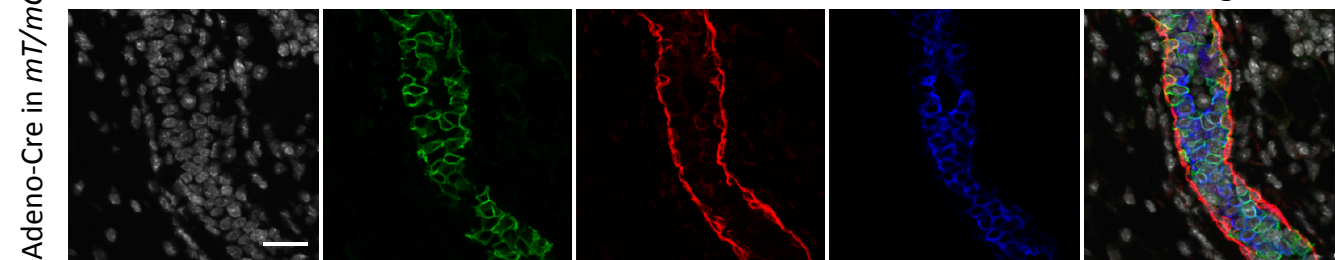

Supplement: supp_30.12.1470_Supplemental_Figure_S1.pdf [file supp_30.12.1470_Supplemental_Figure_S1.pdf]

## Supplemental Figure S10

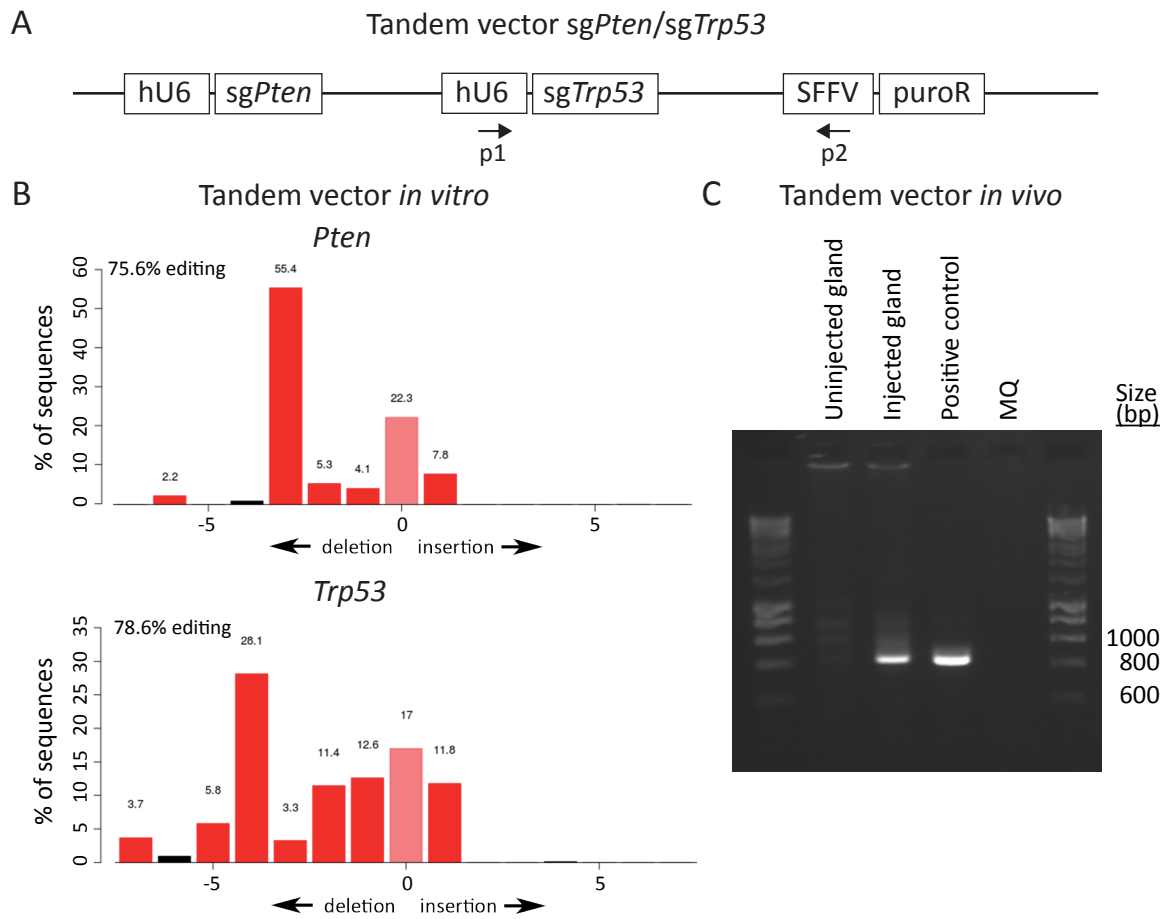

Supplement: supp_30.12.1470_Supplemental_Figure_S10.pdf [file supp_30.12.1470_Supplemental_Figure_S10.pdf]

## Supplemental Figure S2

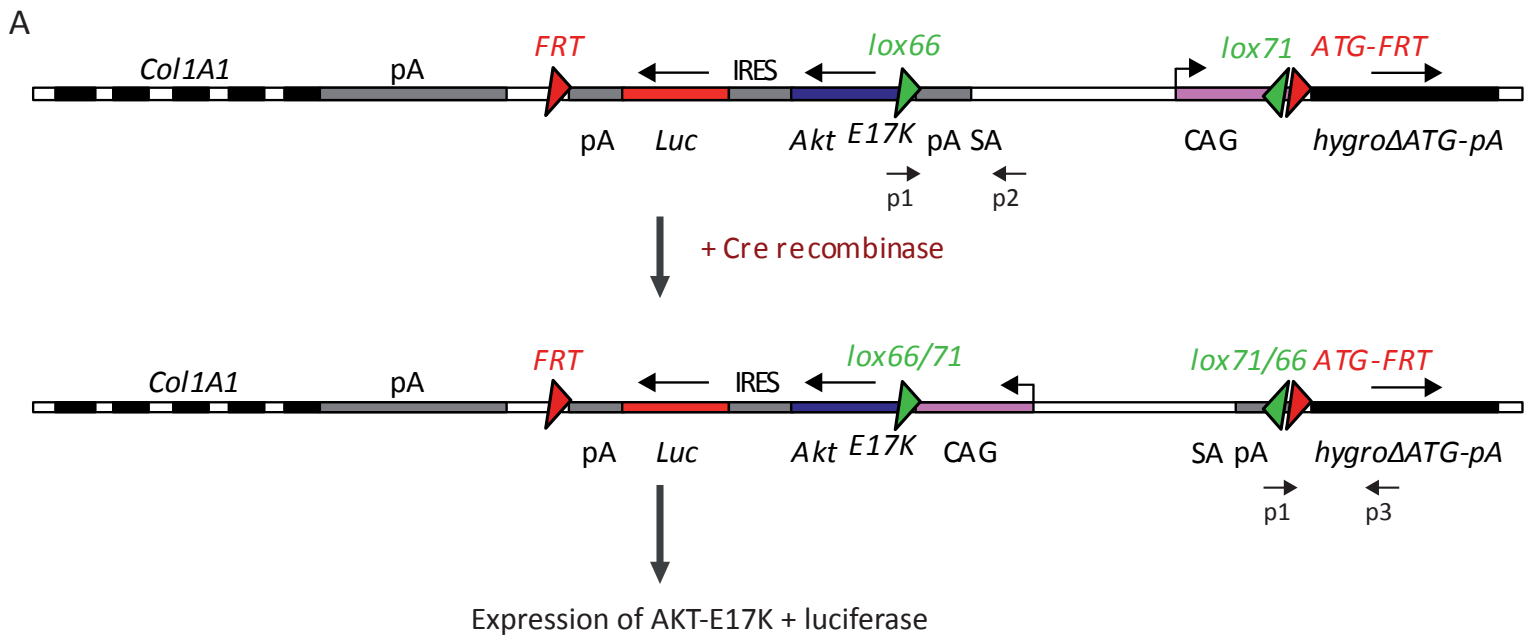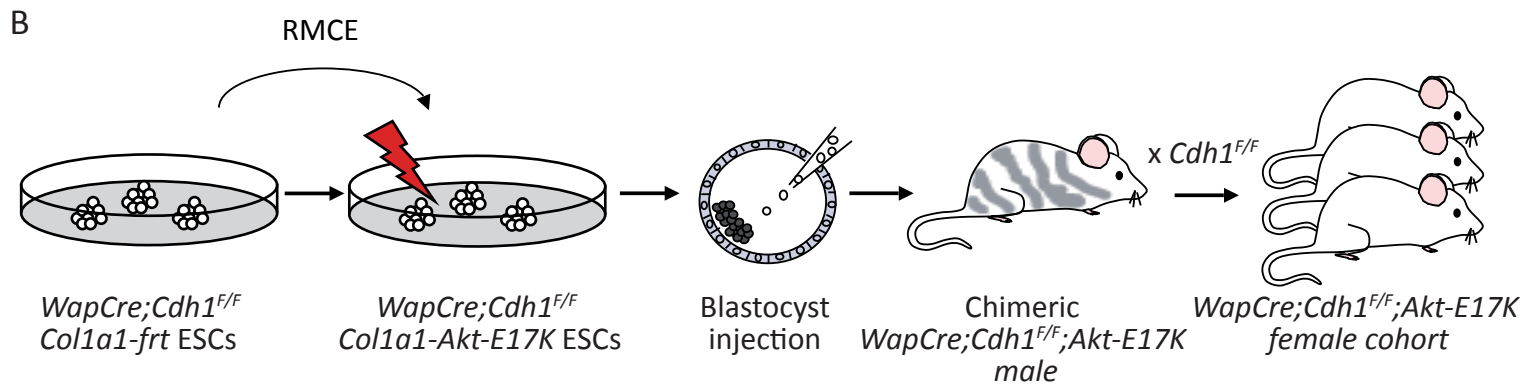

Supplement: supp_30.12.1470_Supplemental_Figure_S2.pdf [file supp_30.12.1470_Supplemental_Figure_S2.pdf]

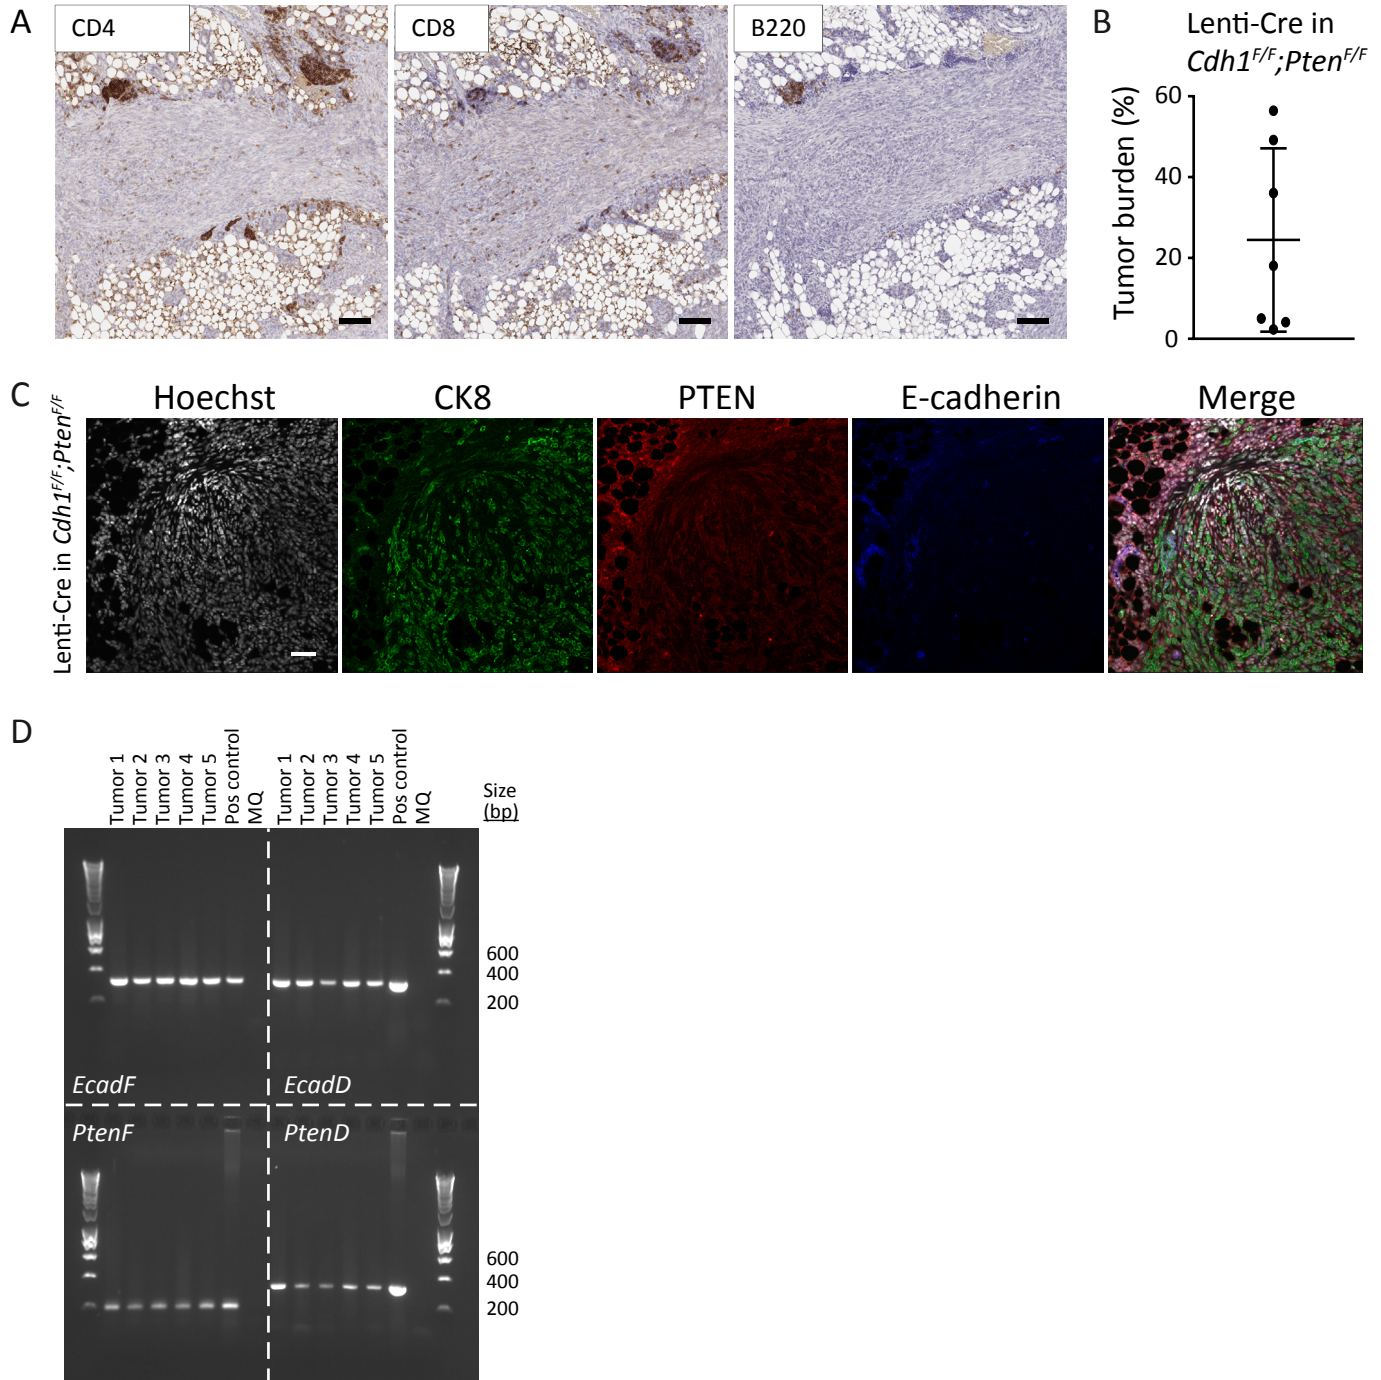

Supplement: supp_30.12.1470_Supplemental_Figure_S4.pdf [file supp_30.12.1470_Supplemental_Figure_S4.pdf]

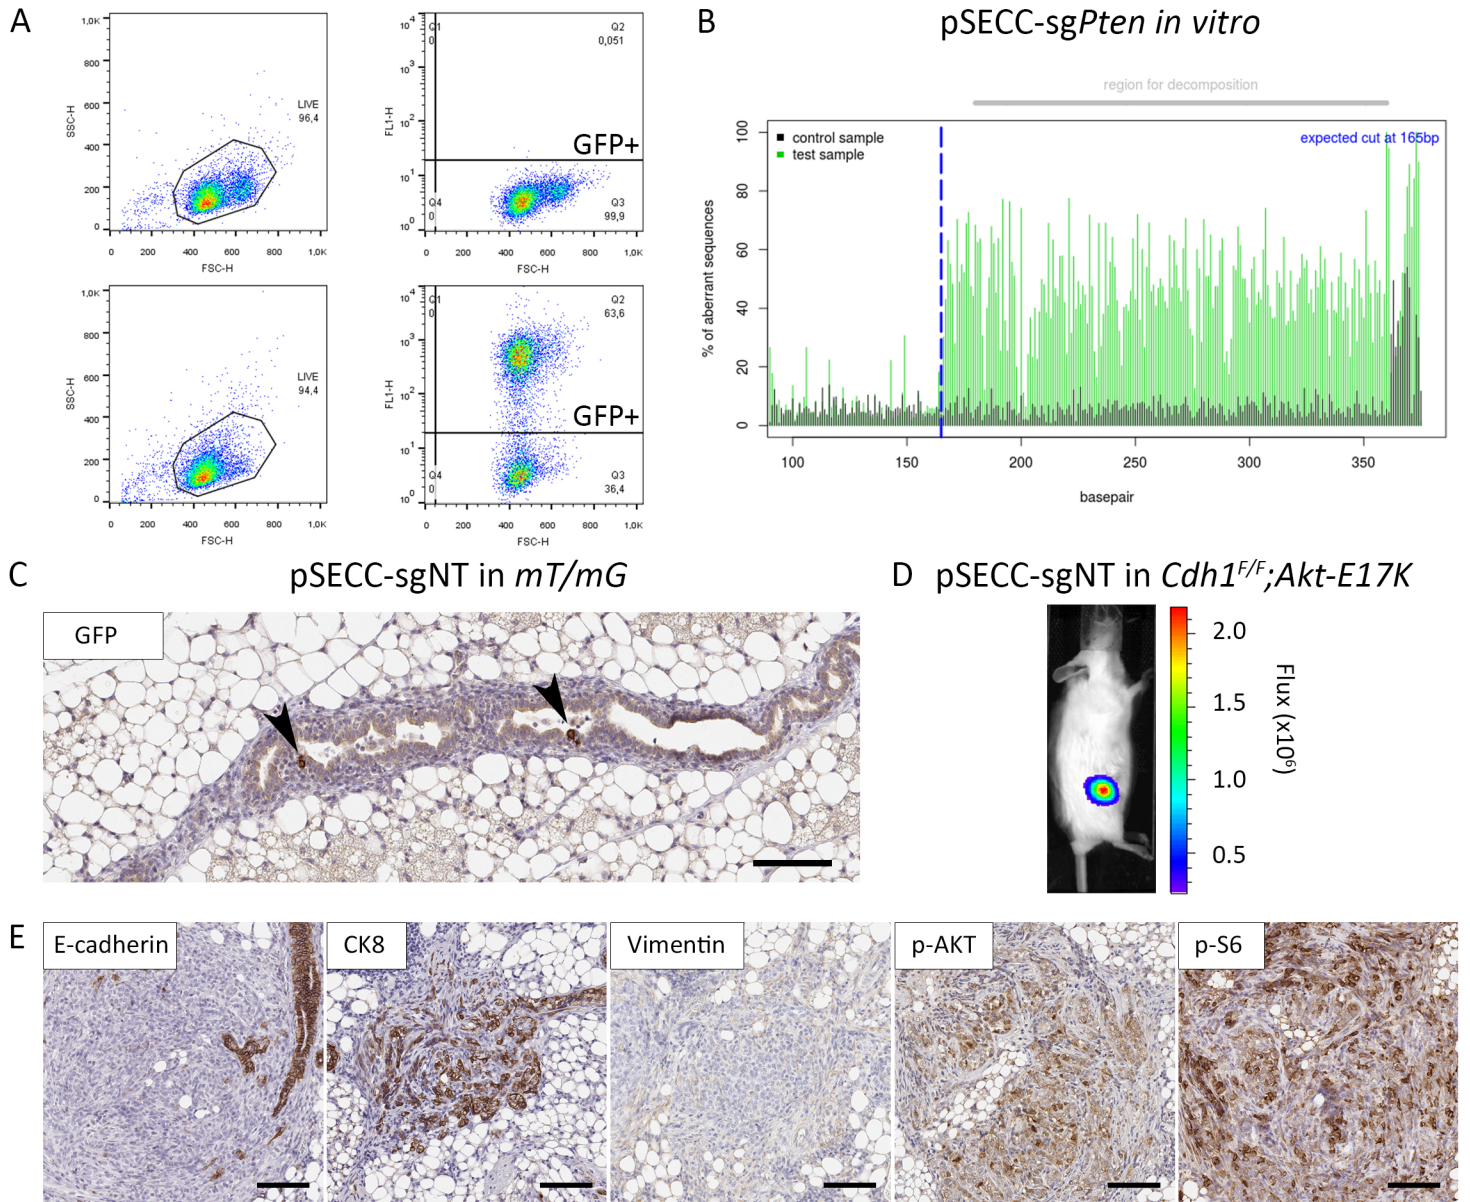

Supplement: supp_30.12.1470_Supplemental_Figure_S5.pdf [file supp_30.12.1470_Supplemental_Figure_S5.pdf]

## Supplemental Figure S7

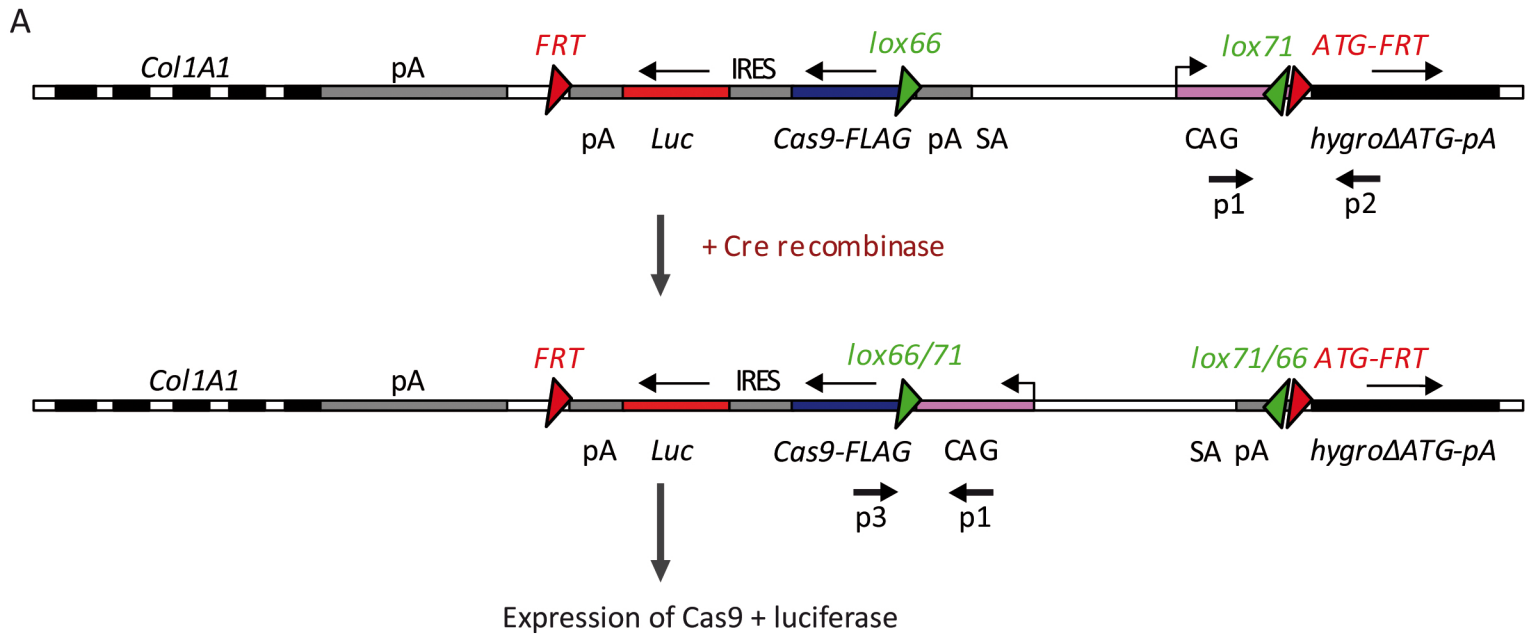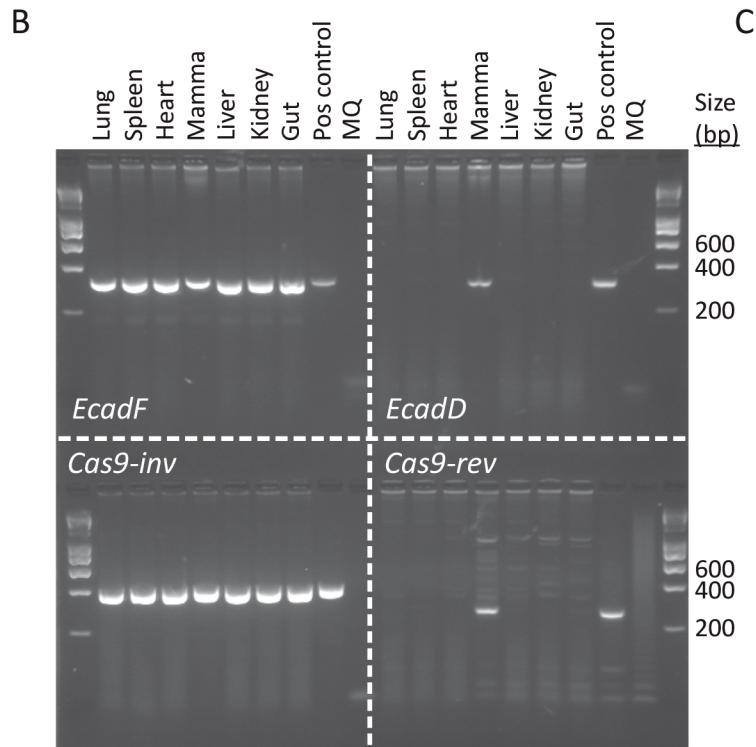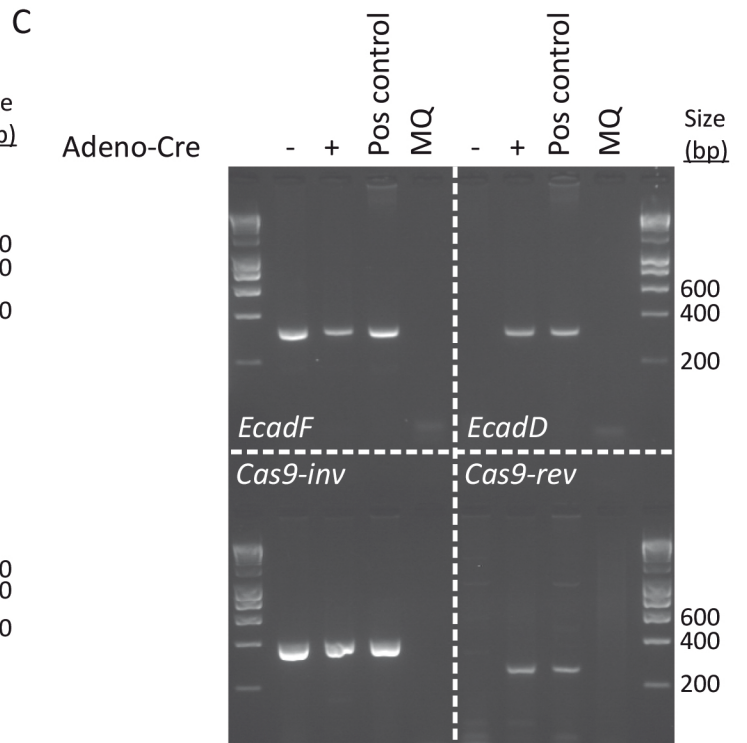**D** LentiGuide-sgPten *in vitro*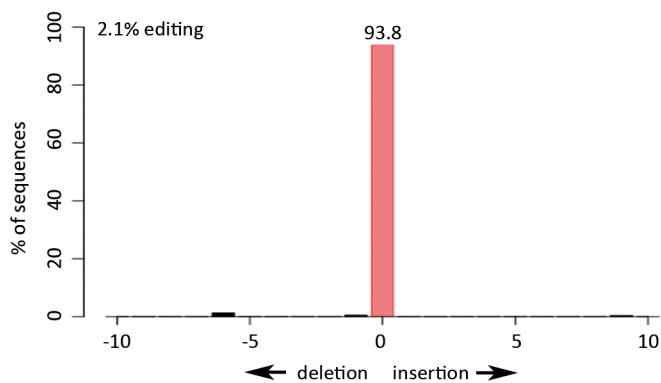Lenti-Cre + LentiGuide-sgNT *in vitro*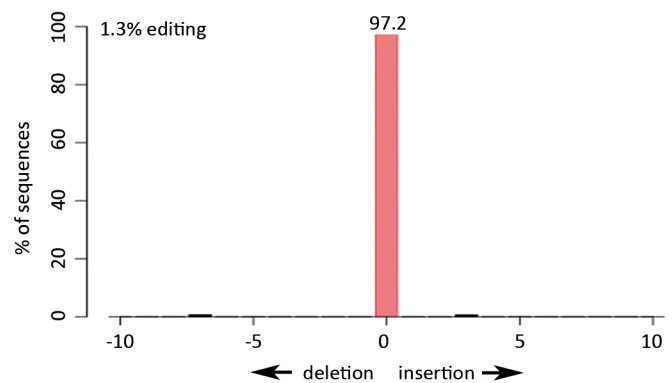

Supplement: supp_30.12.1470_Supplemental_Figure_S7.pdf [file supp_30.12.1470_Supplemental_Figure_S7.pdf]

Lentiguide-sgPten in *WapCre;Cdh1<sup>F/F</sup>;Cas9*

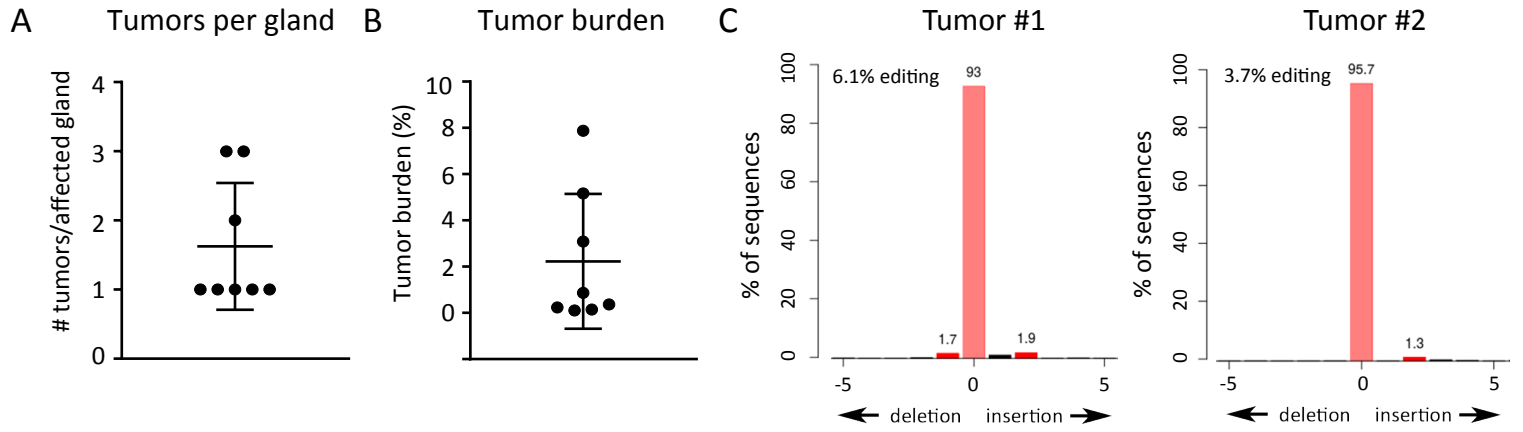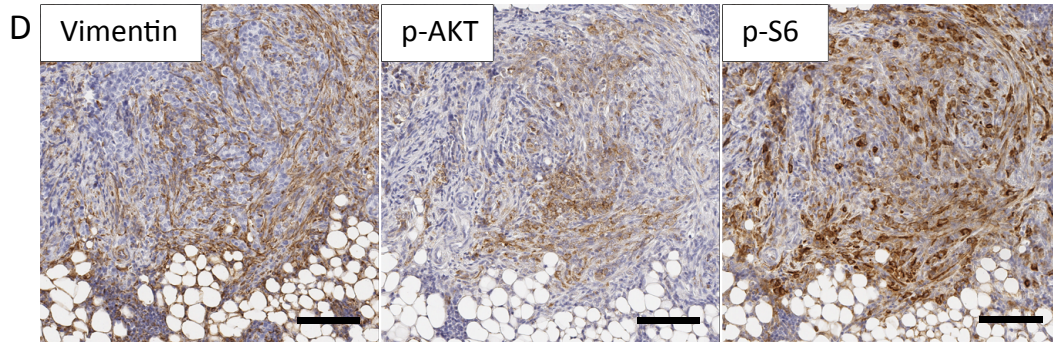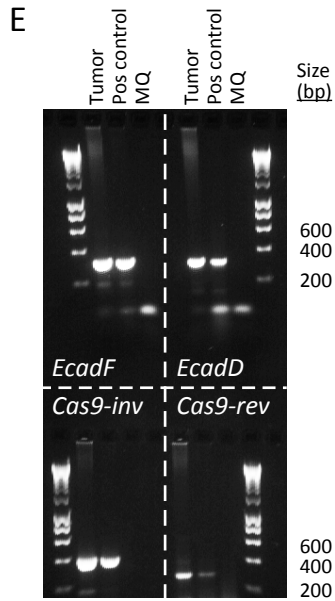

Supplement: supp_30.12.1470_Supplemental_Figure_S8.pdf [file supp_30.12.1470_Supplemental_Figure_S8.pdf]
